# Supplementary material for: Poly(glutamic acid) hydrogels crosslinked via native chemical ligation
Source: Royal Society of Chemistry journal article supplement (doi:10.1039/c7nj00439g), 2017-01-01

## Poly (glutamic acid) Hydrogels crosslinked *via* Native Chemical Ligation

*Zhiping Fan*<sup>\*1</sup>, *Ping Cheng*<sup>2</sup>, *Min Liu*<sup>1</sup>, *Dacheng Li*<sup>1</sup>, *Guiqin Liu*<sup>1</sup>, *Yanna Zhao*<sup>1</sup>, *Zhuang Ding*<sup>1</sup>,  
*Fang Chen*<sup>3</sup>, *Bingquan Wang*<sup>1</sup>, *Xiaoxiao Tan*<sup>4</sup>, *Zhengping Wang*<sup>1</sup>, *Jun Han*<sup>\*1</sup>

<sup>1</sup>Institute of BioPharmaceutical Research, Liaocheng University, Liaocheng 252059, China

<sup>2</sup>Liaocheng High-Tech Biotechnology Co.,Ltd, Liaocheng 252059, China

<sup>3</sup>School of Pharmacy, Liaocheng University, Liaocheng 252059, China

<sup>4</sup>Medical School of the University of Queensland, Brisbane, St. Lucia, Queensland, Australia

\*Corresponding author: [fanzhiping@lcu.edu.cn](mailto:fanzhiping@lcu.edu.cn); [junhanmail@163.com](mailto:junhanmail@163.com)

FOR Journal “*New Journal of Chemistry*”

Figure S0.  $^1\text{H-NMR}$  of PGA

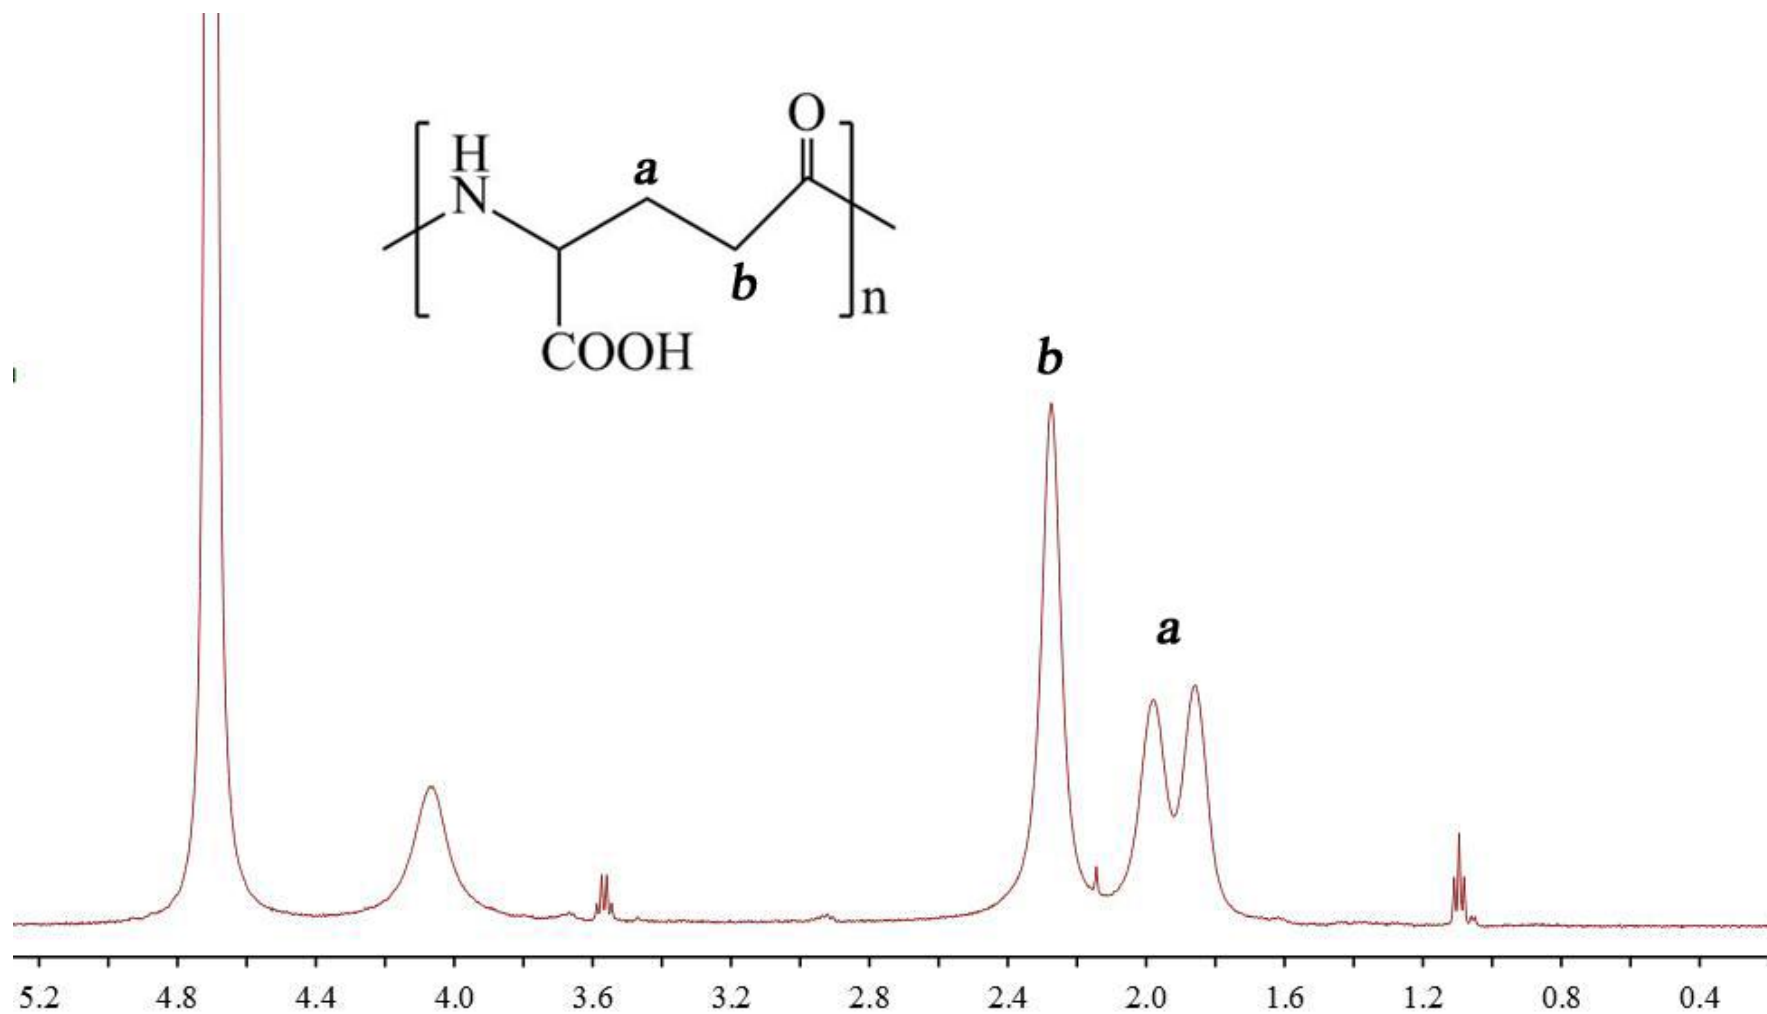

Figure S1.  $^1\text{H-NMR}$  of PGAADH

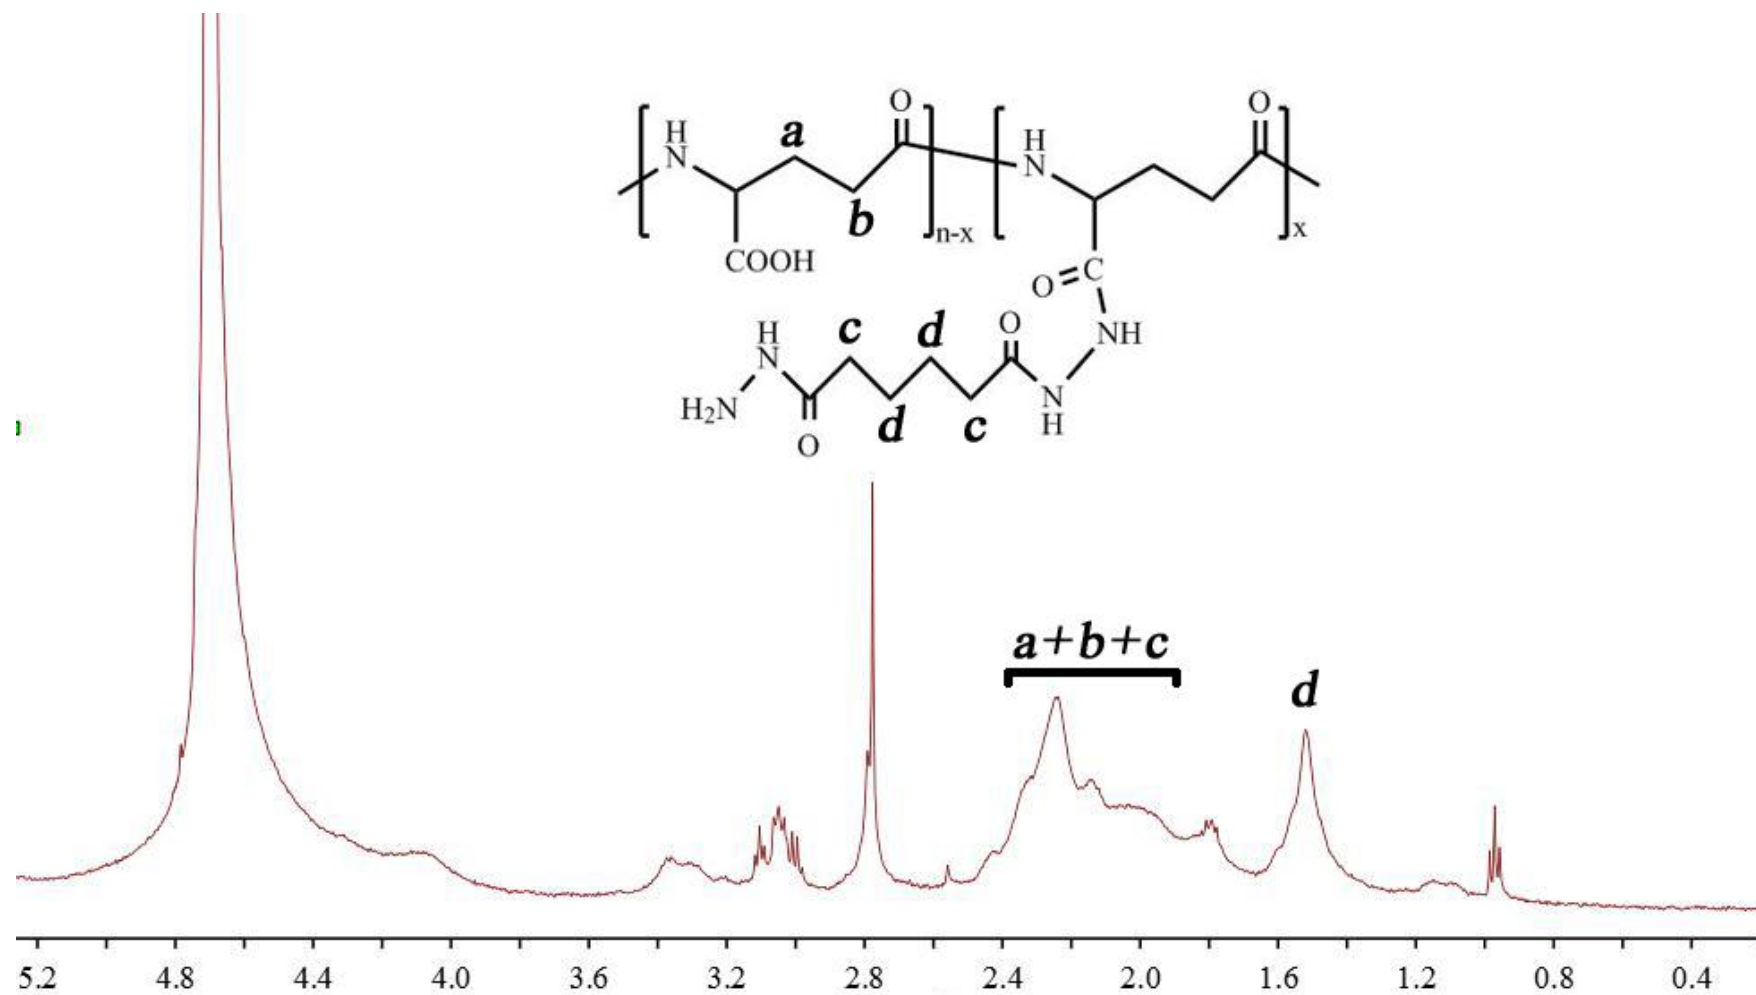

Figure S2.  $^1\text{H-NMR}$  of PGA-C

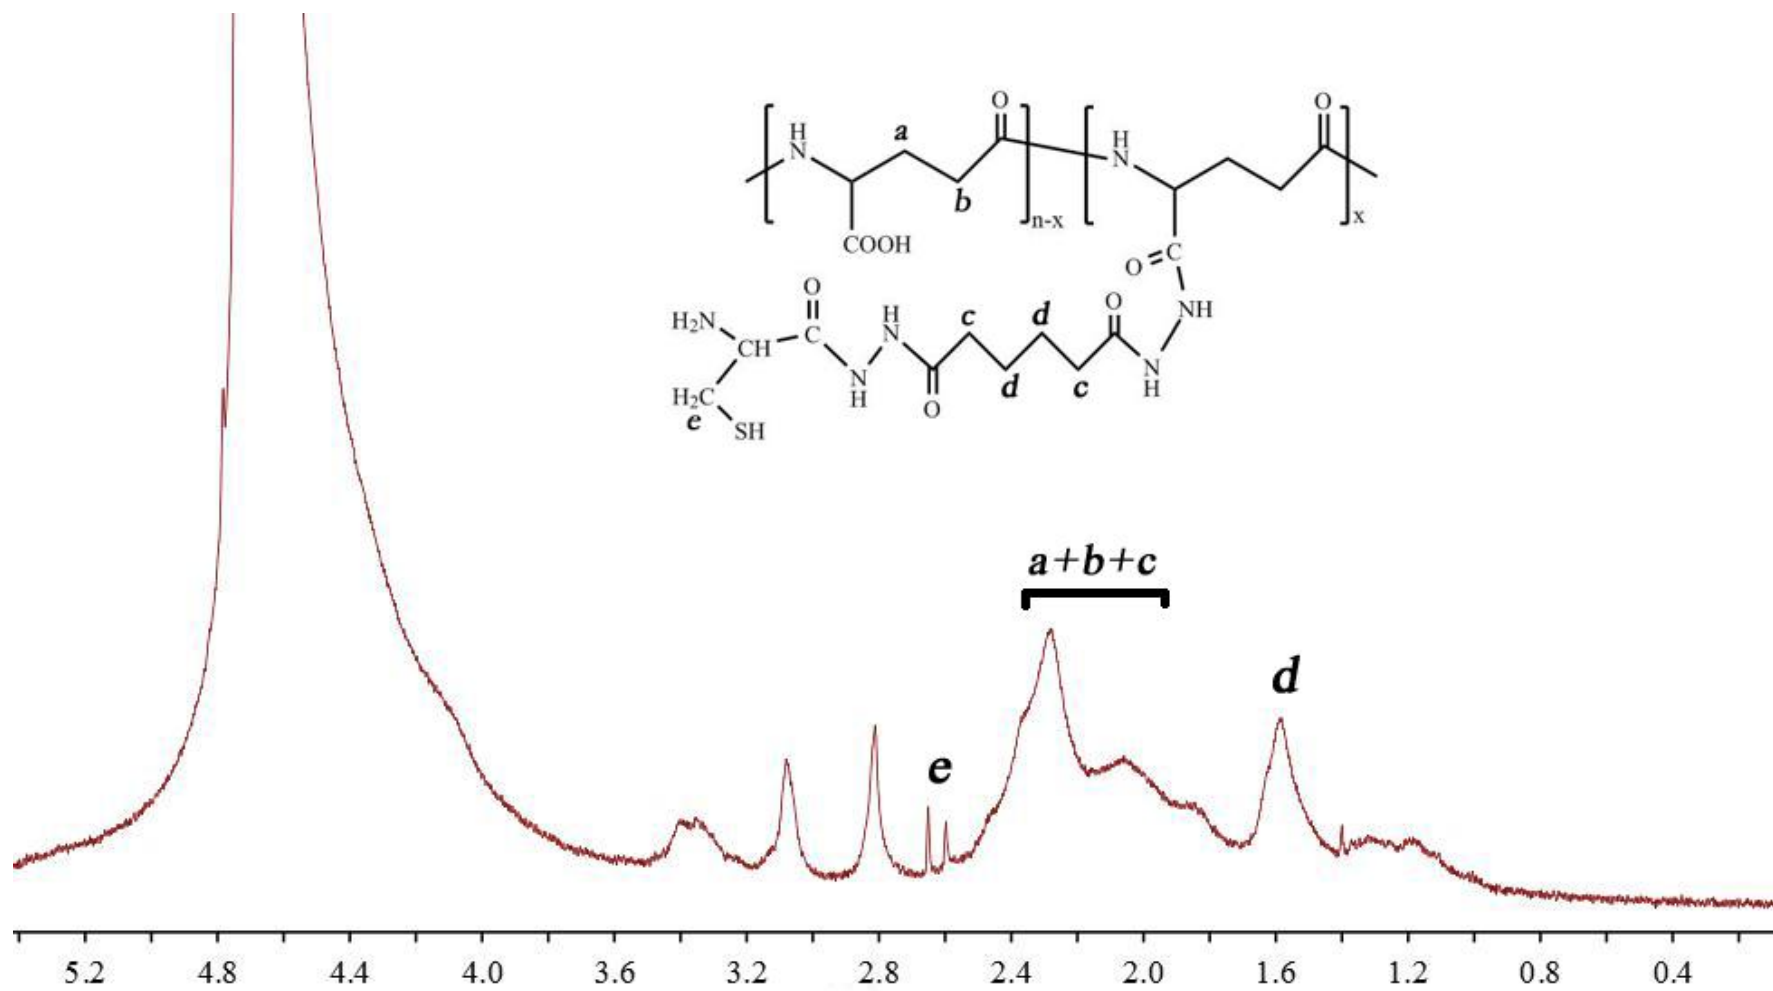

Figure S3.  $^1\text{H-NMR}$  of PGA-HC

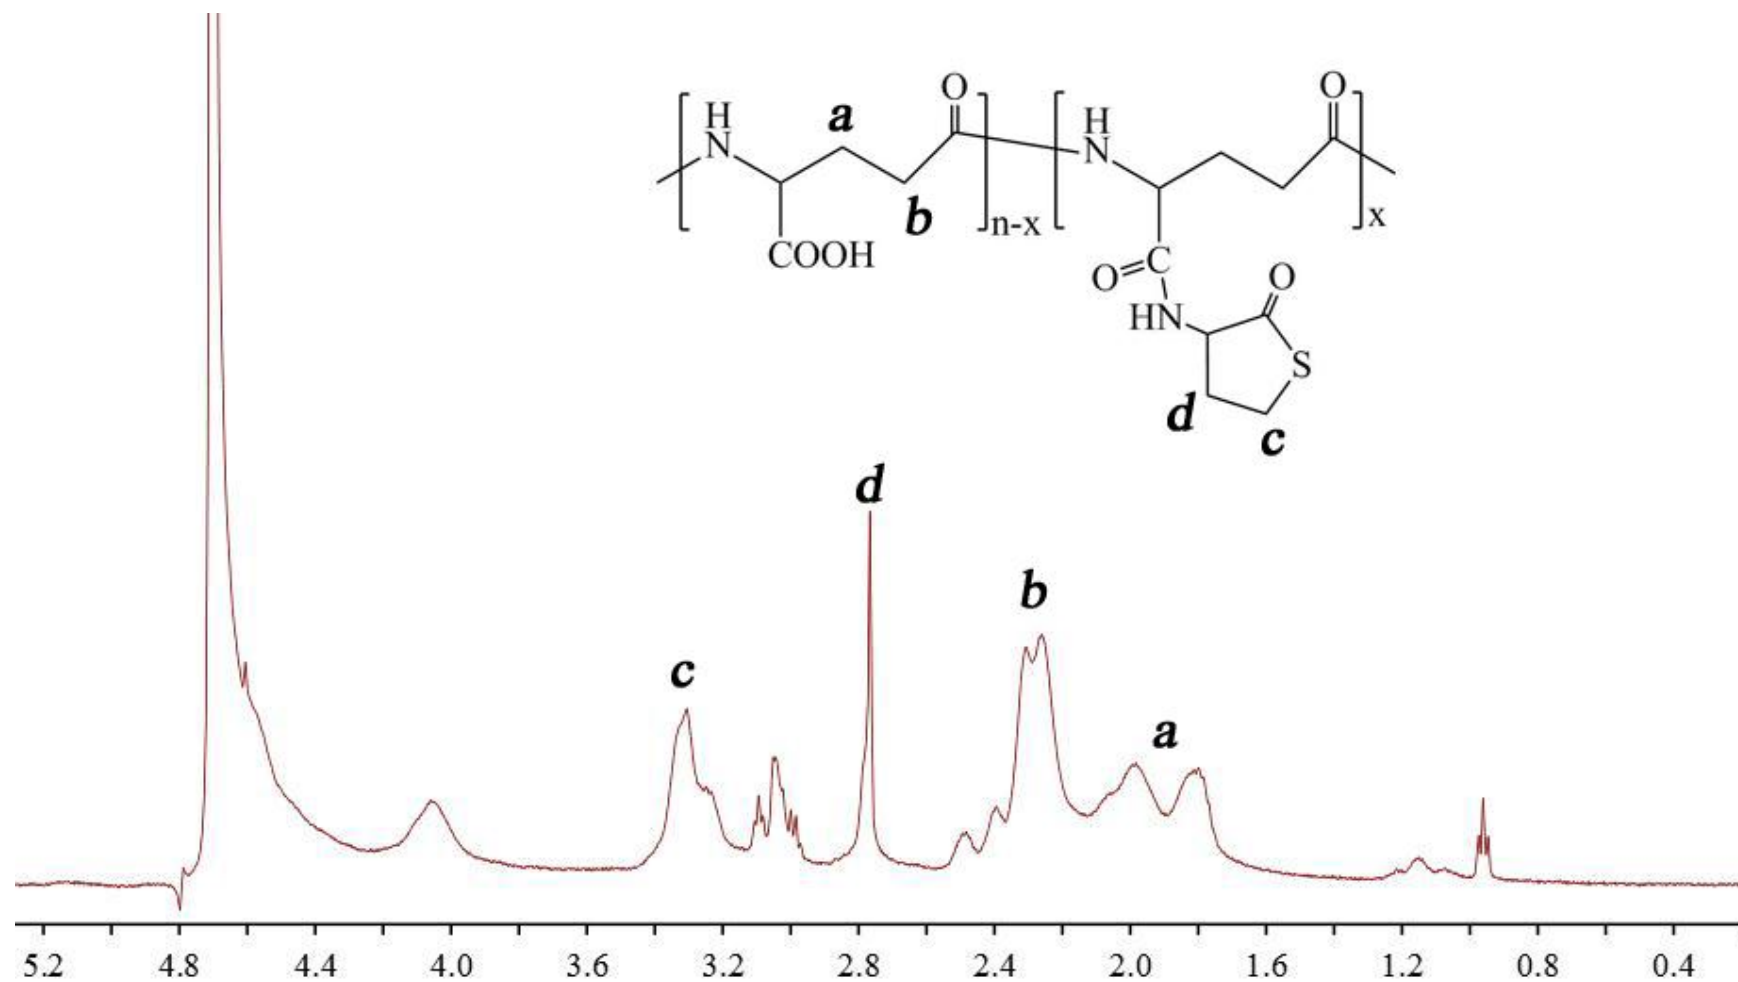

Supplement: c7nj00439g1.pdf [file c7nj00439g1.pdf]
